# Supplementary material for: The Genomic and Transcriptomic Landscape of a HeLa Cell Line
Source: PubMed Central journal article supplement (PMC3737162; doi:10.1534/g3.113.005777), 2013-03-11
Supplement: supp_g3.113.005777_FigureS1.pdf [file supp_g3.113.005777_FigureS1.pdf]

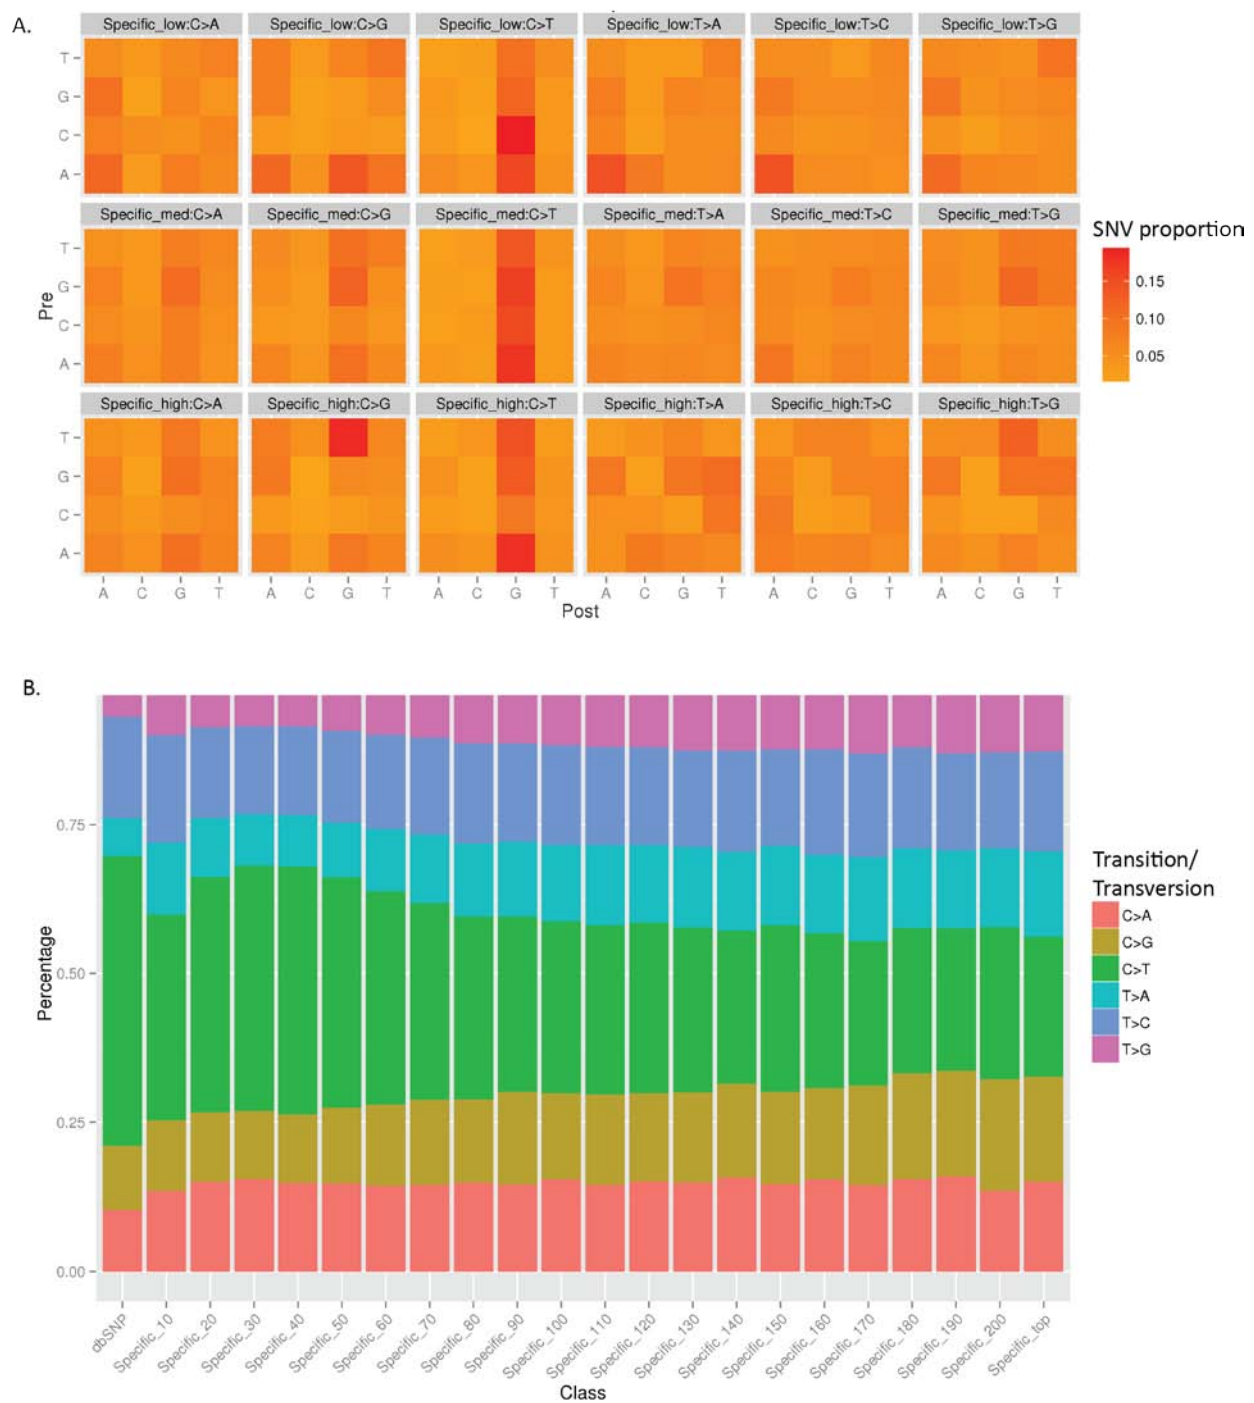

**Figure S1 Mutational spectra in the HeLa Kyoto genome.**

(A) Heatmap representation of mutational spectra observed in HeLa Kyoto specific calls stratified by local coverage (low: < 10; med:  $\geq 10$  and < 60; high:  $\geq 60$ ). Each row corresponds to one group of SNVs and each column to a type of mutation (e.g.: C>A). Each heatmap shows the observed proportion of SNVs for all possible combinations of preceding ('Pre') and following ('Post') bases.

(B) Stacked barplots of the distribution of mutation types (e.g.: C>T) in observed HeLa specific SNVs, stratified by local coverage: Column "Specific\_x" represents calls with coverage between x-10 and x. Column "dbSNP" shows called SNVs that have dbSNP ids, column "Specific\_top" shows calls with local coverage greater than 200.
