# Supplementary material for: The Genomic and Transcriptomic Landscape of a HeLa Cell Line
Source: PubMed Central journal article supplement (PMC3737162; doi:10.1534/g3.113.005777), 2013-03-11
Supplement: supp_g3.113.005777_FigureS3.pdf [file supp_g3.113.005777_FigureS3.pdf]

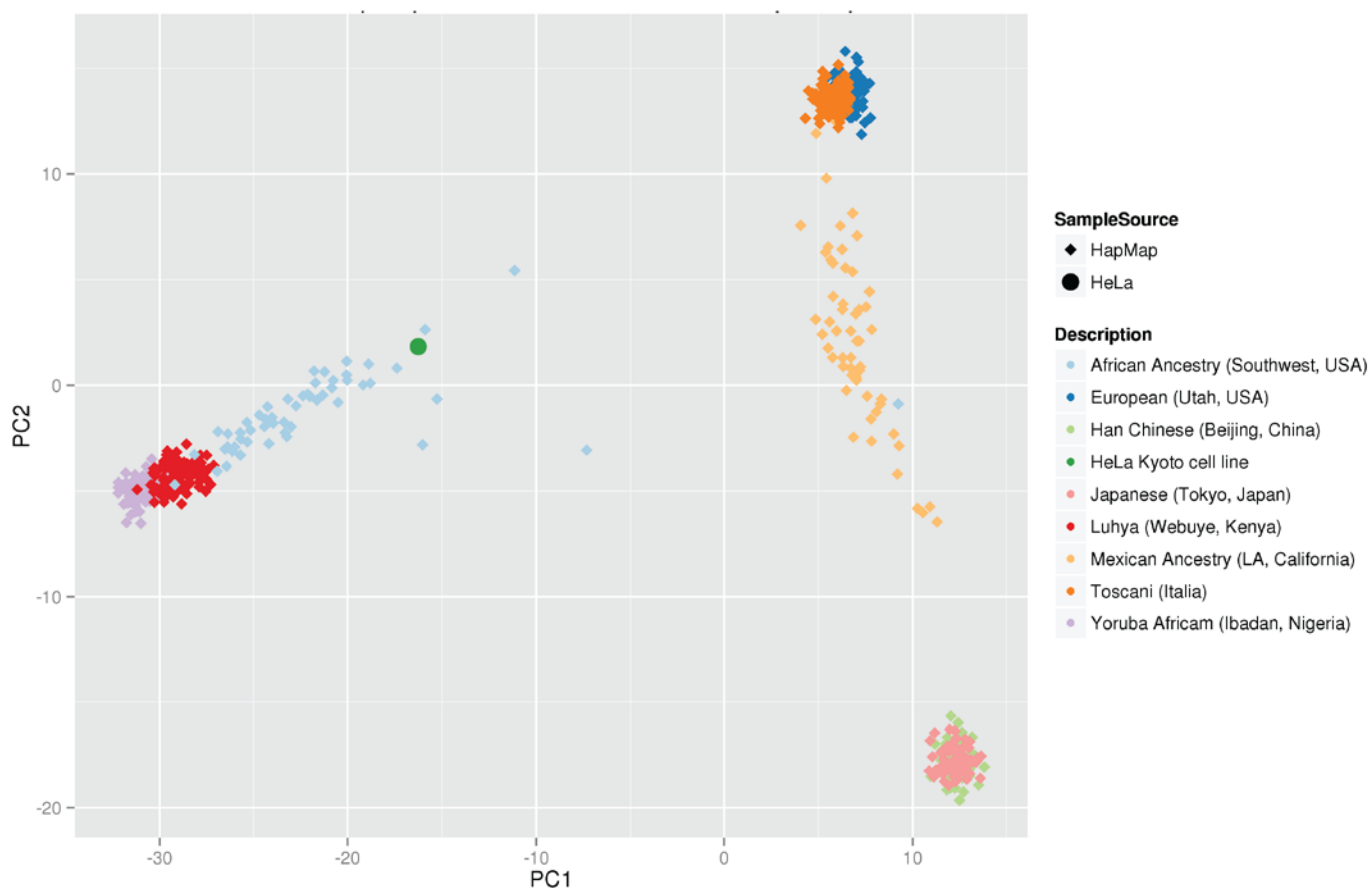

**Figure S3 Principal component analysis of SNVs in HeLa Kyoto and 640 HapMap individuals from 8 different populations.**

The populations are:

CEU - Northern and Western European ancestry from Utah, USA;

CHB - Han Chinese from Beijing, China;

JPT - Japanese from Tokyo, Japan;

YRI - Yoruba from Ibadan, Nigeria;

ASW - African ancestry from Southwest USA;

LWK - Luhya from Webuye, Kenya;

MXL - Mexican ancestry from Los Angeles, USA;

TSI - Toscani from Italy.
