# Supplementary material for: The Genomic and Transcriptomic Landscape of a HeLa Cell Line
Source: PubMed Central journal article supplement (PMC3737162; doi:10.1534/g3.113.005777), 2013-03-11
Supplement: supp_g3.113.005777_G3Statement_005777_FINAL.pdf [file supp_g3.113.005777_G3Statement_005777_FINAL.pdf]

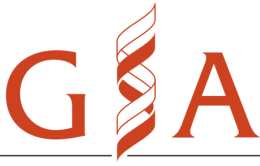

Genetics Society of America

9650 Rockville Pike, Bethesda, MD 20814-3998  
Phone: (301) 634-7300 • Fax: (301) 634-7079  
society@genetics-gsa.org  
www.genetics-gsa.org

26 March 2013

After serious consideration and extensive discussion among The Editors, authors, and other stakeholders, at this time, *G3: Genes/Genomes/Genetics* has elected to allow the Early Online version of Landry *et al.* (2013), The Genomic and Transcriptomic Landscape of a HeLa Cell Line, *published Early Online March 11, 2013*, doi:10.1534/g3.113.005777, to remain online. We are actively working to arrive at a solution where the final published manuscript and associated data addresses the concerns raised while maintaining the standards of the GSA journals and our data policy<sup>1</sup>.

The article's final online publication, originally intended for April 2013, has been rescheduled for the May issue, to allow the researchers and other parties a reasonable timeframe to arrive at a mutual agreement regarding the availability of data. Please contact us if you have additional questions.

**Brenda Andrews, PhD**

Editor in Chief, *G3: Genes/Genomes/Genetics*  
Charles H. Best Chair of Medical Research  
Professor and Chair, Banting & Best Department of Medical Research  
Director, The Donnelly Centre for Cellular and Biomolecular Research  
University of Toronto  
Rm 230 160 College Street  
Toronto, Ontario  
M5S 3E1  
phone: 416-978-8562  
brenda.andrews@utoronto.ca

**Tracey DePellegrin Connelly**

Executive Editor, GSA Journals  
Genetics Society of America  
phone: 412-760-5391  
tracey.depellegrin@thegsajournals.org  
www.g3journal.org  
www.genetics.org

 **G3** • Genes | Genomes | Genetics

---

<sup>1</sup> <http://www.g3journal.org/site/misc/ifora.xhtml#DATA%20AND%20REAGENT%20POLICY>
