# Supplementary material for: The Genomic and Transcriptomic Landscape of a HeLa Cell Line
Source: PubMed Central journal article supplement (PMC3737162; doi:10.1534/g3.113.005777), 2013-03-11
Supplement: supp_g3.113.005777_TableS1.pdf [file supp_g3.113.005777_TableS1.pdf]

**Table S1 Potential viral insertions**

| Chr | Start     | End       | Strand | Read support | Viral species                                                                                                                                                                                                                                      |
|-----|-----------|-----------|--------|--------------|----------------------------------------------------------------------------------------------------------------------------------------------------------------------------------------------------------------------------------------------------|
| 1   | 10002     | 10118     | +      | 12           | Human herpesvirus 6B<br>Equid herpesvirus 2<br>Human herpesvirus 6A<br>Human herpesvirus 7<br>Gallid herpesvirus 2<br>Gallid herpesvirus 3<br>Meleagrid herpesvirus 1<br>Ovine herpesvirus 2<br>Cyprinid herpesvirus 3<br>Saimiriine herpesvirus 1 |
| 8   | 128189764 | 128190032 | -      | 552          | Human papillomavirus 18 and 32<br>(Alphapapillomavirus 7 and 1)                                                                                                                                                                                    |
| 8   | 128192272 | 128192499 | +      | 23           |                                                                                                                                                                                                                                                    |
| 8   | 128193167 | 128193435 | +      | 174          | Human papillomavirus 18<br>(Alphapapillomavirus 7)                                                                                                                                                                                                 |
| 8   | 128200419 | 128200690 | +      | 163          |                                                                                                                                                                                                                                                    |
| 12  | 49659073  | 49659136  | -      | 6            | Human herpesvirus 5                                                                                                                                                                                                                                |
| 12  | 95467     | 95567     | +      | 9            | Human herpesvirus 6B<br>Human herpesvirus 6A<br>Human herpesvirus 7<br>Gallid herpesvirus 2<br>Gallid herpesvirus 3<br>Meleagrid herpesvirus 1<br>Cyprinid herpesvirus 3                                                                           |
| 13  | 19648667  | 19648780  | +      | 7            |                                                                                                                                                                                                                                                    |
| 13  | 19649043  | 19649209  | -      | 8            | Taterapox virus                                                                                                                                                                                                                                    |
| X   | 155185203 | 155185362 | -      | 8            | Human herpesvirus 6B<br>Equid herpesvirus 2<br>Human herpesvirus 6A<br>Human herpesvirus 7<br>Gallid herpesvirus 2<br>Gallid herpesvirus 3<br>Meleagrid herpesvirus 1<br>Ovine herpesvirus 2                                                       |
